# Supplementary material for: Benefit–risk assessment of HMG-CoA reductase inhibitors (statins): a discrete choice experiment
Source: PubMed Central journal article supplement — BMJ Open. 2016 Feb 25;6(2):e009387. doi: 10.1136/bmjopen-2015-009387 (PMC4769438; doi:10.1136/bmjopen-2015-009387), 2016-02-25
Supplement: bmjopen-2015-009387supp_appendix1.pdf [file bmjopen-2015-009387supp_appendix1.pdf]

**Appendix 1** The criteria parameters of six statins,[16-22]

| <b>Statins</b>      | <b>Stroke (%)</b> | <b>MI (%)</b> | <b>Myalgia (%)</b> | <b>Hepatotoxicity (%)</b> |
|---------------------|-------------------|---------------|--------------------|---------------------------|
| <b>Atorvastatin</b> | 25                | 38            | 5.6                | 1.25                      |
| <b>Fluvastatin</b>  | 21                | 43            | 4.4                | 2.55                      |
| <b>Lovastatin</b>   | 31                | 18            | 2.4                | 1.9                       |
| <b>Pravastatin</b>  | 14                | 22            | 1                  | 1.2                       |
| <b>Rosuvastatin</b> | 10                | 36            | 2.8                | 2.2                       |
| <b>Simvastatin</b>  | 24                | 26            | 3.7                | 1                         |

Stroke: Percentage of stroke event reduction, compared to placebo

MI: Percentage of myocardial infarction event reduction, compared to placebo

Myalgia: Percentage of myalgia event, compared to placebo

Hepatotoxicity: Percentage of hepatotoxicity event, compared to placebo
