# Supplementary material for: Benefit–risk assessment of HMG-CoA reductase inhibitors (statins): a discrete choice experiment
Source: PubMed Central journal article supplement — BMJ Open. 2016 Feb 25;6(2):e009387. doi: 10.1136/bmjopen-2015-009387 (PMC4769438; doi:10.1136/bmjopen-2015-009387), 2016-02-25
Supplement: bmjopen-2015-009387supp_appendix2.pdf [file bmjopen-2015-009387supp_appendix2.pdf]

## Appendix 2:

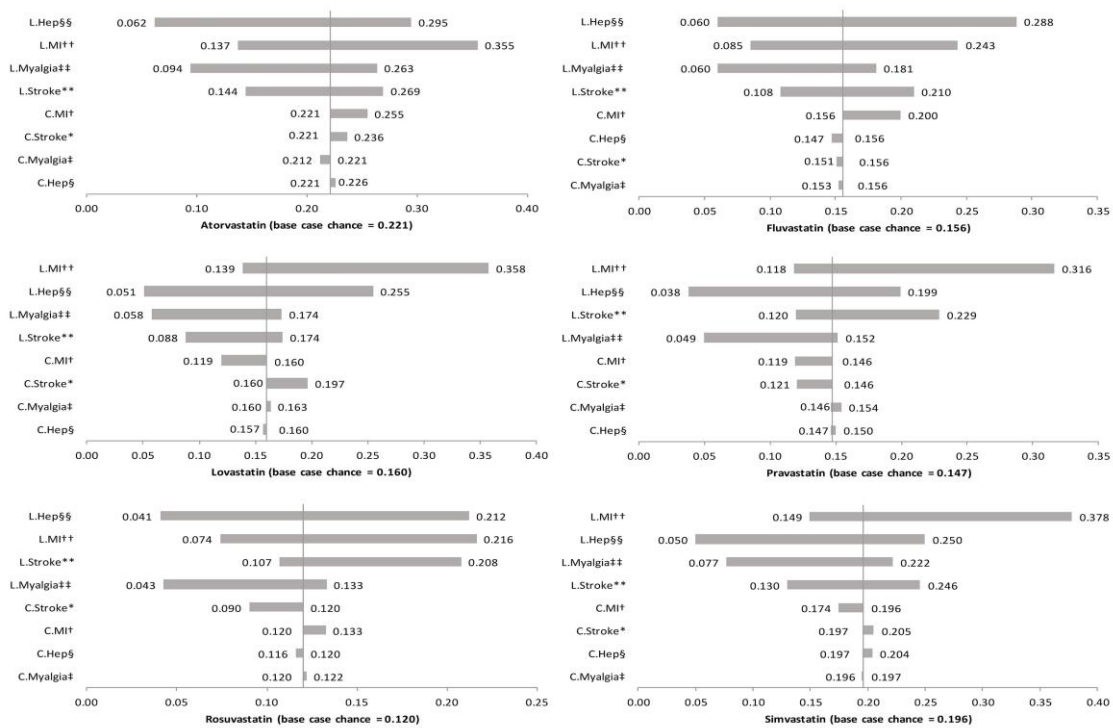

**Appendix 2a** One-way sensitivity analysis tornado diagrams, patients as a base case (Change in probability of being chosen of each statin, varied by coefficients and levels). \* Stroke coefficient (0.026 to 0.050); † Myocardial infarction coefficient (0.021 to 0.042); ‡ Myalgia coefficient (-0.061 to -0.041); § Hepatotoxicity coefficient (-0.368 to -0.308); \*\* Stroke level (5% to 35%); †† Myocardial infarction level (10% to 70%); ‡‡ Myalgia level (0% to 30%); §§ Hepatotoxicity level (0% to 6%)

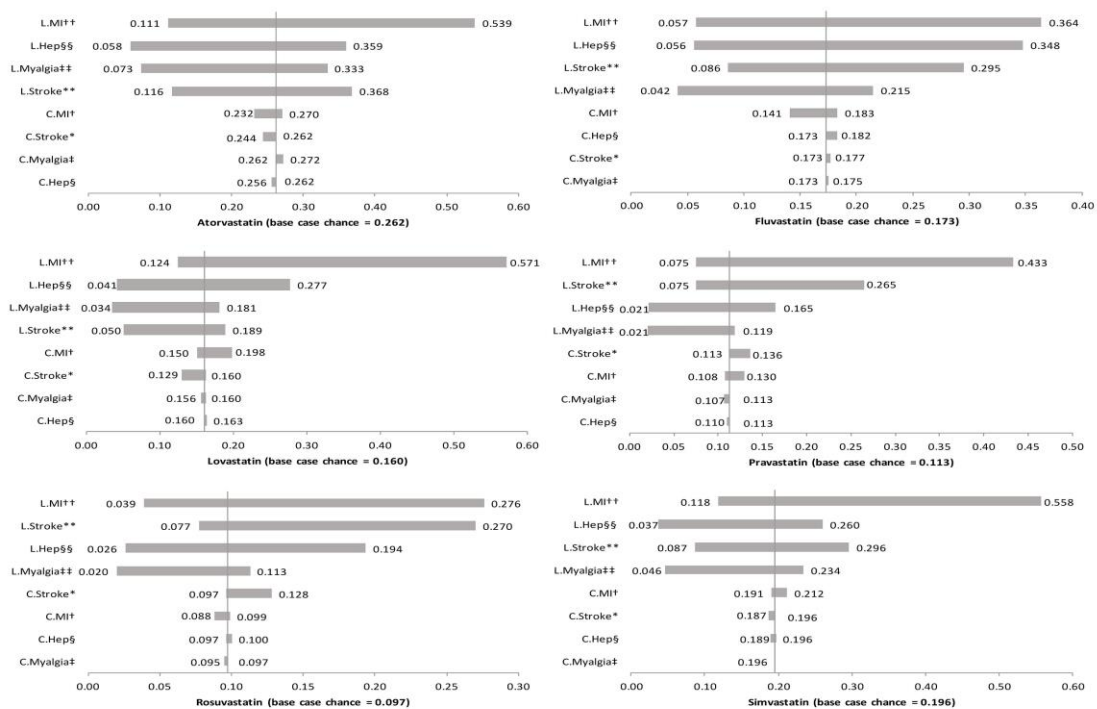

**Appendix 2b** One-way sensitivity analysis tornado diagrams, experts as a base case (Change in probability of being chosen of each statin, varied by coefficients and levels). \* Stroke coefficient (0.026 to 0.050); † Myocardial infarction coefficient (0.021 to 0.042); ‡ Myalgia coefficient (-0.061 to -0.041); § Hepatotoxicity coefficient (-0.368 to -0.308); \*\* Stroke level (5% to 35%); †† Myocardial infarction level (10% to 70%); ‡‡ Myalgia level (0% to 30%); §§ Hepatotoxicity level (0% to 6%)

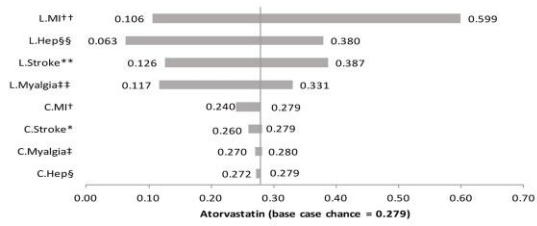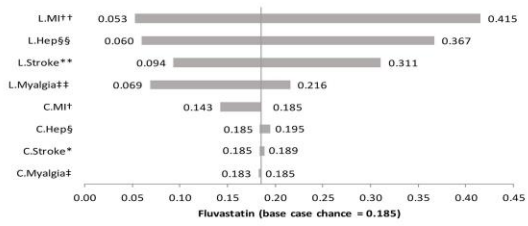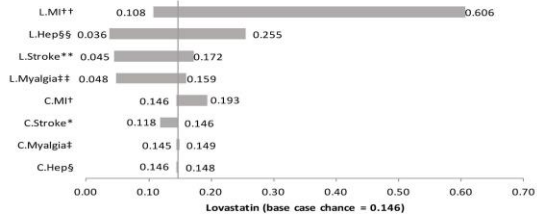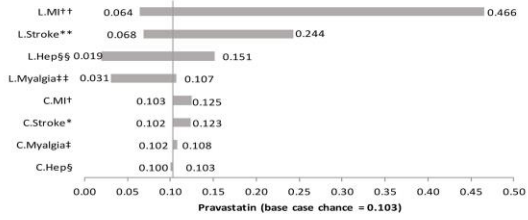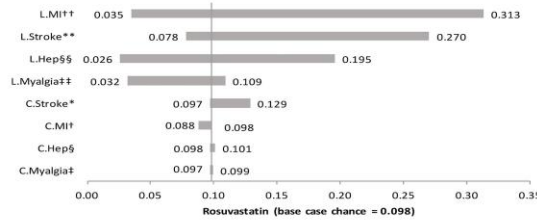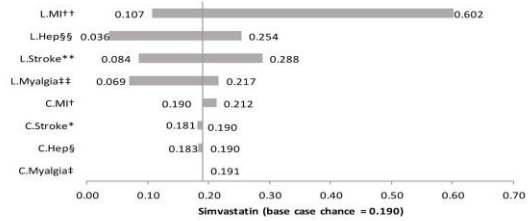

**Appendix 2c** One-way sensitivity analysis tornado diagrams, policy-makers as a base case (Change in probability of being chosen of each statin, varied by coefficients and levels). \* Stroke coefficient (0.026 to 0.050); † Myocardial infarction coefficient (0.021 to 0.042); ‡ Myalgia coefficient (-0.061 to -0.041); § Hepatotoxicity coefficient (-0.368 to -0.308); \*\* Stroke level (5% to 35%); †† Myocardial infarction level (10% to 70%); ‡‡ Myalgia level (0% to 30%); §§ Hepatotoxicity level (0% to 6%)
